# Supplementary material for: Materials with the CrVO4 structure type as candidate superprotonic conductors
Source: PubMed Central journal article supplement — RSC Adv. 2019 Oct 8;9(55):31999–2009. doi: 10.1039/c9ra06291b (PMC9072970; doi:10.1039/c9ra06291b), 2019-10-08
Supplement: RA-009-C9RA06291B-s001.pdf [file RA-009-C9RA06291B-s001.pdf]

## Electronic Supplementary Information for

### “Materials with the CrVO<sub>4</sub> structure type as candidate superprotonic conductors”

Pandu Wisesa, Chenyang Li, Chuhong Wang, and Tim Mueller\*

#### 1. Finding oxidation states and charges

The bond valence-based energy model requires that every atom in the material is assigned a nominal oxidation state. To determine the oxidation states for the elements, we use the following algorithm:

1. For a given structure, list all the likely oxidation states for all the elements in the structure.

We used the information from the book *Chemistry of the Elements*, 2<sup>nd</sup> Edition by Greenwood and Earnshaw<sup>1</sup> to create this list. We assign a prior likelihood to each oxidation state based on the count of the oxidation state in ICSD<sup>2</sup>. We also checked the rarity for a given oxidation state and incremented (or decremented) the count based on whether the oxidation state is never known before (decrement of 5), rare (increment of 10), or common (increment of 50). The relative counts of each state for a given element allow us to determine the prior probability,  $P(\textit{oxidation})$ , of the element achieving that state.

2. For each atom in the structure, calculate the valence,  $BV$ , predicted by the bond-valence method.
3. Let  $P(BV | \textit{oxidation})$  be calculated using a Gaussian distribution over the difference between the atomic valence any given oxidation state. The standard deviation of this distribution was set to be 1. We can then calculate the probability of any oxidation state for a given valence using Bayes' theorem:

$$P(\textit{oxidation} | BV) = P(BV | \textit{oxidation})P(\textit{oxidation}) \quad (1)$$

4. Consider all possible combinations of oxidation states in the structure that preserve charge balance and select the one that maximizes the product of  $P(\textit{oxidation} | BV)$  over all atoms.

The oxidation states are not necessarily equal to the physical charge at each site, but for simplicity we approximated the effective charge to be proportional to the oxidation state. Thus the effective charge of each site was calculated by multiplying the oxidation state by a constant factor,  $q_s$  :

$$q = q_s \times (\textit{oxidation state}) \quad (2)$$

The charge scaling factor  $q_s$  was one of the parameters fit to DFT calculations.

## 2. Treatment of solids and relaxation

To take into account the possible relaxation of atoms in the solids, we treat the atoms in the solid as if they are attached to their ideal lattice sites with springs, where the spring constant  $k$  is defined as:

$$k = k_0 + k_s |q| \quad (1)$$

where  $k_0$  is the base value of the spring constant,  $k_s$  is a charge-scaling factor, and  $q$  is the charge for a given site.

In the presence of a diffuser, an atom is assumed to relax from its ideal site by a distance of  $r_{offset}$ . The pair interaction, accounting for relaxations, is then:

$$E_{relax}(r) = E_{pair}(r + r_{offset}) + \frac{k}{2} (r_{offset})^2 \quad (2)$$

where  $r$  is the ideal distance between the atoms.

To find the value of  $r_{offset}$  at equilibrium, the force between the two atoms must be zero:

$$0 = \frac{dE_{relax}(r)}{dr_{offset}} = E_{pair}'(r + r_{offset}) + kr_{offset} \quad (3)$$

We approximate  $E_{pair}'(r + r_{offset})$  using Taylor expansion:

$$E_{pair}'(r + r_{offset}) \approx E_{pair}'(r) + E_{pair}''(r)r_{offset} \quad (4)$$

substituting equation (2.4) to equation (2.3):

$$0 = \frac{dE_{relax}(r)}{dr_{offset}} \approx E_{pair}'(r) + E_{pair}''(r)r_{offset} + kr_{offset} \quad (5)$$

$$r_{offset} \approx \frac{-E_{pair}'(r)}{E_{pair}''(r) + k} . \quad (6)$$

The above expression allows us to rapidly estimate the value of  $r_{offset}$  and approximately account for atomic relaxation in our energy model.

### 3. Energy model construction and parameters

To screen for potential proton conductors, we employed a simple energy model that combines an exponential repulsion term backed with a Coulomb screening term:

$$E_{pair} = E_{Exp} + E_{Coulomb} \quad (7)$$

where

$$E_{Coulomb} = k \frac{q_i q_j}{r} e^{-\frac{r}{d}} \quad (8)$$

$$E_{exp} = A e^{-rC} . \quad (9)$$

The exponential repulsion term is backed by the bond-valence parameters and model found by Brese and O'Keefe<sup>3</sup>:

$$R_o = r_i + r_j - \frac{r_i r_j (\sqrt{c_i} - \sqrt{c_j})^2}{c_i r_i + c_j r_j} \quad (10)$$

where  $r_i$  ,  $r_j$  ,  $c_i$  , and  $c_j$  are element specific parameters provided by Brese and O'Keefe.

Initial values for the parameters  $A$  and  $C$  (we will call these  $A_0$  and  $C_0$ ) were found using the following algorithm:

1. Determine the effective charges for the atoms in the material using the approach described in section 1.
2. For each atom in the structure, calculate the  $R_o$  value between that atom and hydrogen from O'Keefe and Brese's parameters and equation. This is the initial  $R_o$  and we will call it  $R_{o\_init}$  .

3. Scale  $R_{o\_init}$  with a universal scaling factor,  $r_s$ , such that  $R_{o\_s} = R_{o\_init} r_s$ . We scaled the value of  $R_o$  because O'Keefe and Brese showed that while the  $R_o$  values found from their model show a linear correlation with the real observed bond distances, the value they had for hydrogen is an outlier.<sup>3</sup>
4. For each of the following structure types,
  - a. Rhenium trioxide
  - b. Cristabolite
  - c. Cuprite
  - d. Wurtzite (hexagonal)
  - e. Rutile
  - f. Fluorite
  - g. Rock salt
  - h. Cesium chloride,

find the bond valence  $s_{ij}$  between anions and cations based on the coordination number.

5. Using the value of  $s_{ij}$  and  $R_{o\_s}$  found above, calculate the ideal  $r$  for every given structure

using the bond valence relationship,  $s_{ij} = \exp\left(\frac{R_o - r}{b}\right)$ .

6. Fit  $A_0$  and  $C_0$  by minimizing the difference between the equilibrium bond lengths for the energy model and ideal  $r$  values found in step 6. The values for  $A_0$  and  $C_0$  found this way are shown in Table 1-S

**Table 1-S.** The values of  $A_0$  and  $C_0$  for different elements from the algorithm above before scaling factor is applied.

| Atomic Number | Element Name | $A_0$ value (eV) | $C_0$ value (1/Å) |
|---------------|--------------|------------------|-------------------|
| 1             | hydrogen     | 221.9308         | 6.326371          |
| 3             | lithium      | 1488.779         | 5.987387          |
| 4             | beryllium    | 855.2014         | 6.058016          |
| 5             | boron        | 807.1233         | 6.054705          |
| 6             | carbon       | 818.045          | 6.050931          |
| 7             | nitrogen     | 724.9243         | 6.068031          |
| 8             | oxygen       | 575.4666         | 6.104692          |
| 9             | fluorine     | 393.2073         | 6.164485          |
| 11            | sodium       | 12387.92         | 6.433914          |
| 12            | magnesium    | 2926.124         | 5.907983          |
| 13            | aluminum     | 2417.579         | 5.949664          |
| 14            | silicon      | 2304.041         | 5.935647          |
| 15            | phosphorus   | 2172.857         | 5.932193          |
| 16            | sulfur       | 1928.756         | 5.965598          |
| 17            | chlorine     | 1743.925         | 5.967689          |
| 19            | potassium    | 39767.03         | 6.245923          |
| 20            | calcium      | 19687.23         | 6.363112          |
| 21            | scandium     | 10919.34         | 6.400903          |
| 22            | titanium     | 3418.643         | 5.86216           |
| 23            | vanadium     | 3030.132         | 5.91109           |
| 24            | chromium     | 2627.325         | 5.927545          |
| 25            | manganese    | 2682.867         | 5.913579          |
| 26            | iron         | 2615.633         | 5.917104          |
| 27            | cobalt       | 2097.285         | 5.935246          |
| 28            | nickel       | 1802.869         | 5.951649          |
| 29            | copper       | 1065.052         | 6.02664           |
| 30            | zinc         | 1978.228         | 5.948852          |
| 31            | gallium      | 2504.425         | 5.918385          |
| 32            | germanium    | 3047.044         | 5.909144          |
| 33            | arsenic      | 3211.198         | 5.876663          |
| 34            | selenium     | 3107.699         | 5.899439          |
| 35            | bromine      | 2721             | 5.930455          |
| 37            | rubidium     | 20451            | 5.732408          |
| 38            | strontium    | 11571.63         | 5.771011          |
| 39            | yttrium      | 7618.364         | 5.813256          |
| 40            | zirconium    | 13426.42         | 6.304055          |
| 41            | niobium      | 5372.929         | 5.853688          |
| 42            | molybdenum   | 4870.293         | 5.8563            |
| 44            | ruthenium    | 2976.293         | 5.903065          |

|    |              |          |          |
|----|--------------|----------|----------|
| 45 | rhodium      | 2804.601 | 5.92546  |
| 46 | palladium    | 2171.285 | 5.941574 |
| 47 | silver       | 2247.833 | 5.934706 |
| 48 | cadmium      | 3977.844 | 5.928631 |
| 49 | indium       | 12185.16 | 6.441506 |
| 50 | tin          | 5193.418 | 5.857844 |
| 51 | antimony     | 9265.984 | 6.10237  |
| 52 | tellurium    | 17296.56 | 6.384611 |
| 53 | iodine       | 4866.394 | 5.851438 |
| 55 | cesium       | 105654.4 | 6.104346 |
| 56 | barium       | 23628.27 | 5.731376 |
| 57 | lanthanum    | 37704.82 | 6.250221 |
| 58 | cerium       | 12127.21 | 5.756003 |
| 59 | praseodymium | 11849.48 | 5.780223 |
| 60 | neodymium    | 10987.64 | 5.778148 |
| 62 | samarium     | 10245.66 | 5.798301 |
| 63 | europium     | 10392.85 | 5.789439 |
| 64 | gadolinium   | 9151.173 | 5.794684 |
| 65 | terbium      | 9149.794 | 5.832182 |
| 66 | dysprosium   | 8339.335 | 5.822479 |
| 67 | holmium      | 9062.617 | 5.883528 |
| 68 | erbium       | 7322.257 | 5.811325 |
| 69 | thulium      | 7133.626 | 5.816795 |
| 70 | ytterbium    | 6862.874 | 5.818053 |
| 71 | lutetium     | 17959.58 | 6.379059 |
| 72 | hafnium      | 15323.36 | 6.399602 |
| 73 | tantalum     | 5506.245 | 5.883319 |
| 74 | tungsten     | 5085.098 | 5.851917 |
| 75 | rhenium      | 4922.541 | 5.849618 |
| 77 | iridium      | 4992.275 | 5.850301 |
| 80 | mercury      | 4271.098 | 5.874973 |
| 81 | thallium     | 11094.77 | 5.795774 |
| 82 | Lead         | 8600.042 | 5.826843 |
| 83 | bismuth      | 8769.27  | 5.808584 |
| 90 | thorium      | 14500.64 | 5.80836  |
| 92 | uranium      | 9543.9   | 5.79126  |

For cation-cation interactions, the value of  $A$  was calculated by multiplying  $A_0$  by a universal scaling constant  $a_s$  :



$$A = A_0 a_s \quad (11)$$

For anion-cation interactions, we did not scale the value of  $A$ . A similar approach was used for  $C$ . For an anion-cation interaction:

$$C_{eff} = \frac{C}{a_c} \quad (12)$$

and for a cation-cation interaction

$$C_{eff} = c_c C \quad (13)$$

Altogether, there are eight parameters (such as the scaling factors) for the energy model that were determined by fitting to DFT-calculated activation energies of a training set of 52 materials. The list of eight parameters and their final values are shown in Table 2-S, and the training data are summarized in Table 3-S.

**Table 2-S.** Parameters used in the model and their values after fitting.  $q_e$  is the elementary charge.

| Symbol | Parameter                                | Value | Unit                          |
|--------|------------------------------------------|-------|-------------------------------|
| $k_0$  | Spring constant base value               | 5     | eV / Å <sup>2</sup>           |
| $k_s$  | Spring constant scaling                  | 4     | eV / ( $q_e$ Å <sup>2</sup> ) |
| $d$    | Screening radius for Coulomb interaction | 0.71  | Angstrom                      |
| $q_s$  | Charge scaling                           | 0.42  |                               |
| $a_s$  | Cation-cation scaling term for $A$       | 0.83  |                               |
| $a_c$  | Anion-cation scaling term for $C$        | 0.79  |                               |
| $c_c$  | Cation-cation scaling term for $C$       | 0.90  |                               |
| $r_s$  | Universal $R_o$ -value scale             | 0.91  |                               |

Fitting to DFT calculations was done incrementally using a grid search using the Pearson correlation coefficient as the primary metric after accounting for outliers identified using the average error and standard deviation of the predicted values. We started with the cubic perovskite

crystal class, then added hexagonal perovskite, spinel, elpasolite and other randomly selected structure. Through this method we were able to rapidly identify a good region of parameter space and then refine our values. The outcome of the final fitting process for the 52 training structures is shown in Table 3-S:

**Table 3-S.** The 52 structures used to train the model.

| <b>Composition</b>                  | <b>Oxide Structure Type</b> | <b>Model Predicted Activation Energy (eV)</b> | <b>DFT+NEB Calculated Activation Energy (eV)</b> | <b>Absolute Difference (eV)</b> |
|-------------------------------------|-----------------------------|-----------------------------------------------|--------------------------------------------------|---------------------------------|
| Ca <sub>2</sub> MgWO <sub>6</sub>   | Alternating Perovskite      | 0.416737                                      | 0.564008                                         | 0.147271                        |
| CrSrO <sub>3</sub>                  | Cubic Perovskite            | 0.25348                                       | 0.19972                                          | 0.053759                        |
| CaTiO <sub>3</sub>                  | Cubic Perovskite            | 0.317002                                      | 0.46147                                          | 0.144468                        |
| MoSrO <sub>3</sub>                  | Cubic Perovskite            | 0.386586                                      | 0.599814                                         | 0.213228                        |
| KTaO <sub>3</sub>                   | Cubic Perovskite            | 0.409248                                      | 0.386502                                         | 0.022745                        |
| GePbO <sub>3</sub>                  | Cubic Perovskite            | 0.293683                                      | 0.3292                                           | 0.035517                        |
| CaSiO <sub>3</sub>                  | Cubic Perovskite            | 0.426016                                      | 0.37739                                          | 0.048626                        |
| NaWO <sub>3</sub>                   | Cubic Perovskite            | 0.294477                                      | 0.230381                                         | 0.064096                        |
| KCrO <sub>3</sub>                   | Cubic Perovskite            | 0.375982                                      | 0.309166                                         | 0.066816                        |
| SrZrO <sub>3</sub>                  | Cubic Perovskite            | 0.469067                                      | 0.741086                                         | 0.272019                        |
| BaTiO <sub>3</sub>                  | Cubic Perovskite            | 0.369738                                      | 0.249483                                         | 0.120255                        |
| BaZrO <sub>3</sub>                  | Cubic Perovskite            | 0.502707                                      | 0.27732                                          | 0.225387                        |
| BaIrO <sub>3</sub>                  | Cubic Perovskite            | 0.439164                                      | 0.378972                                         | 0.060192                        |
| BaSnO <sub>3</sub>                  | Cubic Perovskite            | 0.463129                                      | 0.179522                                         | 0.283607                        |
| BaPbO <sub>3</sub>                  | Cubic Perovskite            | 0.556238                                      | 0.266042                                         | 0.290196                        |
| SrNbO <sub>3</sub>                  | Cubic Perovskite            | 0.412975                                      | 0.330074                                         | 0.082901                        |
| BaNbO <sub>3</sub>                  | Cubic Perovskite            | 0.435342                                      | 0.251341                                         | 0.184001                        |
| LaAlO <sub>3</sub>                  | Cubic Perovskite            | 0.230819                                      | 0.287421                                         | 0.056601                        |
| SrTiO <sub>3</sub>                  | Cubic Perovskite            | 0.335922                                      | 0.189221                                         | 0.1467                          |
| Ba <sub>2</sub> NiO <sub>6</sub> Re | Elpasolite                  | 0.737628                                      | 0.580371                                         | 0.157257                        |
| GaO <sub>6</sub> SbSr <sub>2</sub>  | Elpasolite                  | 0.567261                                      | 0.514962                                         | 0.052299                        |
| Ba <sub>2</sub> MgWO <sub>6</sub>   | Elpasolite                  | 0.546621                                      | 0.532571                                         | 0.01405                         |
| Ba <sub>2</sub> FeMoO <sub>6</sub>  | Elpasolite                  | 0.507778                                      | 0.578513                                         | 0.070736                        |
| Ba <sub>2</sub> FeReO <sub>6</sub>  | Elpasolite                  | 0.458289                                      | 0.546507                                         | 0.088218                        |
| Ba <sub>2</sub> ZnReO <sub>6</sub>  | Elpasolite                  | 0.486157                                      | 0.48288                                          | 0.003277                        |
| Ba <sub>2</sub> CoReO <sub>6</sub>  | Elpasolite                  | 0.577129                                      | 0.480684                                         | 0.096445                        |
| Ba <sub>2</sub> MoNiO <sub>6</sub>  | Elpasolite                  | 0.467585                                      | 0.495648                                         | 0.028063                        |
| BaSiO <sub>3</sub>                  | Hexagonal Perovskite        | 0.479127                                      | 0.87437                                          | 0.395243                        |
| BaNiO <sub>3</sub>                  | Hexagonal Perovskite        | 0.773659                                      | 0.810901                                         | 0.037242                        |
| BaRuO <sub>3</sub>                  | Hexagonal Perovskite        | 0.776816                                      | 0.464395                                         | 0.312421                        |

|                                                |                      |          |          |          |
|------------------------------------------------|----------------------|----------|----------|----------|
| BaCoO <sub>3</sub>                             | Hexagonal Perovskite | 0.968349 | 0.855273 | 0.113075 |
| LaCrO <sub>3</sub>                             | Hexagonal Perovskite | 0.26082  | 0.363617 | 0.102797 |
| Si <sub>2</sub> Sc <sub>2</sub> O <sub>7</sub> | Pyrochlore           | 0.388962 | 0.40772  | 0.018758 |
| SiO <sub>2</sub>                               | Quartz               | 0.123985 | 0.499558 | 0.375574 |
| Rh <sub>2</sub> ZnO <sub>4</sub>               | Spinel               | 0.369029 | 0.330071 | 0.038958 |
| Rh <sub>2</sub> MgO <sub>4</sub>               | Spinel               | 0.360327 | 0.258765 | 0.101562 |
| Rh <sub>2</sub> CoO <sub>4</sub>               | Spinel               | 0.357971 | 0.333853 | 0.024119 |
| Ni <sub>2</sub> SiO <sub>4</sub>               | Spinel               | 0.234994 | 0.112817 | 0.122177 |
| Al <sub>2</sub> MgO <sub>4</sub>               | Spinel               | 0.249057 | 0.132738 | 0.116319 |
| Rh <sub>2</sub> CdO <sub>4</sub>               | Spinel               | 0.580161 | 0.756126 | 0.175965 |
| MgTi <sub>2</sub> O <sub>4</sub>               | Spinel               | 0.277899 | 0.620978 | 0.343079 |
| CdV <sub>2</sub> O <sub>4</sub>                | Spinel               | 0.582393 | 0.452657 | 0.129736 |
| GeCo <sub>2</sub> O <sub>4</sub>               | Spinel               | 0.266736 | 0.203161 | 0.063575 |
| Cr <sub>2</sub> CdO <sub>4</sub>               | Spinel               | 0.347283 | 0.362269 | 0.014986 |
| CdIn <sub>2</sub> O <sub>4</sub>               | Spinel               | 0.664341 | 0.375366 | 0.288975 |
| AlNi <sub>2</sub> O <sub>4</sub>               | Spinel               | 0.967221 | 0.984806 | 0.017585 |
| ZnAl <sub>2</sub> O <sub>4</sub>               | Spinel               | 0.220391 | 0.210962 | 0.00943  |
| Mg <sub>2</sub> VO <sub>4</sub>                | Spinel               | 0.348982 | 0.105376 | 0.243606 |
| Ga <sub>2</sub> ZnO <sub>4</sub>               | Spinel               | 0.307155 | 0.334726 | 0.027571 |
| CaFeO <sub>3</sub>                             | Tilted Perovskite    | 0.345664 | 0.30236  | 0.043304 |
| BaNbO <sub>2</sub>                             | Zircon               | 0.131521 | 0.430281 | 0.298761 |

The simple energy model allows for analytical derivatives, which we use to calculate the gradient and Hessian matrix of the potential energy surface at every point on a regular three dimensional grid. From each point on this grid we use gradient descent to identify a nearby stationary point, at which the magnitude of the gradient is zero. We then evaluate the eigenvalues of the Hessian matrix to identify whether the stationary point is a saddle point. From each saddle point gradient descent on the potential energy surface is used to identify the endpoints of a hop that passes through that saddle point. The set of possible hops is completed by applying symmetry operations to all known hops and linking sites that are close together (within 1 Angstrom) but are not already connected by a hop. We evaluate all pathways through the diffusion hop network that start at the site predicted to have the lowest energy and end at a translationally equivalent site. The path for which the maximum energy along the path is lowest is used to calculate the migration

energy, which is simply defined as the difference between the highest and lowest energy points along the path.

#### **4. Band gaps and DFT+U calculations**

In this section we show the calculated band gaps and the results of proton migration barriers using DFT+U and compared to the results without +U in the main text (Table 2). The DFT+U calculations were performed for CrVO<sub>4</sub>-structured oxides that contain elements of Co, Cr, Fe, Mn, Ni, and V (Table 4-S). The U parameters were chosen according to Wang et al.<sup>4</sup> by fitting to experimental formation enthalpies. We have used the POTCAR files used by the Materials Project for the oxides containing Fe and Ni, because the DFT+U calculations had difficulty converging for these materials using the GW PAW POTCAR files we used in the rest of this work. The band gaps with and without DFT+U were calculated in the same way as other DFT calculations (see the Methodology section in the main text), followed by a static calculation by setting ICHARG=11 in VASP and using the charge density from the previously converged self-consistent run.

**Table 4-S.** Proton migration activation barrier and band gap for all 29 CrVO<sub>4</sub>-structured oxides without and with DFT+U.

| ICSD ID | Composition        | DFT Activation Barrier without / with U (eV) | U value (eV)      | Band gap without / with U (eV) |
|---------|--------------------|----------------------------------------------|-------------------|--------------------------------|
| 16618   | InPO <sub>4</sub>  | 0.340 / -                                    | -                 | 2.51 / -                       |
| 16619   | TiPO <sub>4</sub>  | 0.270 / -                                    | -                 | 1.21 / -                       |
| 16741*  | NiSO <sub>4</sub>  | 0.187 / 0.183                                | Ni: 6.2           | 3.97 / 4.93                    |
| 16759   | MgSO <sub>4</sub>  | 0.234 / -                                    | -                 | 4.52 / -                       |
| 18117   | MgCrO <sub>4</sub> | 0.094 / 0.065                                | Cr: 3.7           | 2.15 / 2.49                    |
| 18118   | CdCrO <sub>4</sub> | 0.056 / 0.056                                | Cr: 3.7           | 2.03 / 2.31                    |
| 23492   | CoCrO <sub>4</sub> | 0.094 / 0.204                                | Co: 3.32, Cr: 3.7 | 0.03 / 1.51                    |
| 23493*  | NiCrO <sub>4</sub> | 0.053 / 0.061                                | Ni: 6.2, Cr: 3.7  | 0.71 / 1.92                    |
| 23507*  | FeSO <sub>4</sub>  | 0.164 / 0.187                                | Fe: 5.3           | 2.12 / 4.07                    |
| 25700*  | NiSeO <sub>4</sub> | 0.188 / 0.209                                | Ni: 6.2           | 1.07 / 2.37                    |
| 31231   | MnSO <sub>4</sub>  | 0.217 / 0.190                                | Mn: 3.9           | 2.60 / 3.86                    |
| 33736   | CoSO <sub>4</sub>  | 0.229 / 0.235                                | Co: 3.32          | 3.40 / 4.53                    |
| 36244   | CrVO <sub>4</sub>  | 0.172 / 0.100                                | V: 3.25, Cr: 3.7  | 0.52 / 1.79                    |
| 60571   | CdSO <sub>4</sub>  | 0.177 / -                                    | -                 | 3.34 / -                       |
| 62159   | CrPO <sub>4</sub>  | 0.242 / 0.326                                | Cr: 3.7           | 0.68 / 1.88                    |
| 82282   | TiPO <sub>4</sub>  | 0.321 / -                                    | -                 | 0.01 / -                       |
| 82286   | VPO <sub>4</sub>   | 0.196 / 0.188                                | V: 3.25           | 0.00 / 1.65                    |
| 82161*  | FeVO <sub>4</sub>  | 0.129 / 0.102                                | V: 3.25, Fe: 5.3  | 0.03 / 3.11                    |
| 89505   | LiMnO <sub>4</sub> | 0.086 / 0.072                                | Mn: 3.9           | 1.32 / 1.53                    |
| 109070  | MgSeO <sub>4</sub> | 0.282 / -                                    | -                 | 2.87 / -                       |
| 109071  | MnSeO <sub>4</sub> | 0.165 / 0.226                                | Mn: 3.9           | 0.06 / 1.57                    |
| 109072  | CoSeO <sub>4</sub> | 0.256 / 0.195                                | Co: 3.32          | 0.57 / 2.00                    |
| 109073  | CuSeO <sub>4</sub> | 0.295 / -                                    | -                 | 1.35 / -                       |
| 155065* | FePO <sub>4</sub>  | 0.171 / 0.220                                | Fe: 5.3           | 0.03 / 5.07                    |
| 155162  | InVO <sub>4</sub>  | 0.054 / 0.055                                | V: 3.25           | 3.02 / 3.12                    |
| 159272  | AlPO <sub>4</sub>  | 0.161 / -                                    | -                 | 5.78 / -                       |
| 166436  | TiSiO <sub>4</sub> | 0.091 / -                                    | -                 | 1.54 / -                       |
| 183216  | CuCrO <sub>4</sub> | 0.154 / 0.089                                | Cr: 3.7           | 1.10 / 1.38                    |
| 416147  | HgCrO <sub>4</sub> | 0.085 / 0.073                                | Cr: 3.7           | 1.39 / 1.46                    |

\*These calculations were performed using the pseudopotential files used by the Materials Project.

## 5. VASP PAW potentials

Table 5-S provides a list of the VASP PAW potentials used in this work for each element.

**Table 5-S.** VASP PAW potentials used for each element.

| <b>Element</b> | <b>Pseudopotential</b>     |
|----------------|----------------------------|
| Ac             | PAW_PBE Ac 06Sep2000       |
| Ag             | PAW Ag_GW 06Mar2008        |
| Al             | PAW Al_GW 19Mar2012        |
| Am             | PAW_PBE Am 08May2007       |
| Ar             | PAW Ar_GW 02Oct2006        |
| As             | PAW As_GW 20Mar2012        |
| At             | PAW At 21May2007           |
| Au             | PAW Au_GW 23Mar2010        |
| B              | PAW B 28Sep2005            |
| Ba             | PAW Ba_sv_GW 23Mar2010     |
| Be             | PAW Be_GW 04Mar2008        |
| Bi             | PAW Bi_GW 07Mar2011        |
| Br             | PAW_PBE Br 20Mar2012       |
| C              | PAW C_GW_new 19Mar2012     |
| Ca             | PAW Ca_sv_GW 31Mar2010     |
| Cd             | PAW Cd_f_GW 18May2010      |
| Ce             | PAW Ce_GW 26Mar2009        |
| Cl             | PAW Cl_GW 19Mar2012        |
| Cm             | PAW_PBE Cm 17Jan2011       |
| Co             | PAW Co_GW 31Mar2010        |
| Cr             | PAW_PBE Cr 06Sep2000       |
| Cs             | PAW Cs_sv_GW 23Mar2010     |
| Cu             | PAW Cu_GW 19May2006        |
| Dy             | PAW_PBE Dy 23Dec2003       |
| Er             | PAW_PBE Er 01Sep2006       |
| Eu             | PAW_PBE Eu 23Dec2003       |
| F              | PAW F_GW 19Mar2012         |
| Fe             | PAW Fe_GW 31Mar2010        |
| Fr             | PAW_PBE Fr_sv 29May2007    |
| Ga             | PAW Ga_GW 22Mar2012        |
| Gd             | PAW_PBE Gd 23Dec2003       |
| Ge             | PAW Ge 04Okt2005           |
| H              | PAW H_GW 21Apr2008         |
| He             | PAW He_GW 13May2007        |
| Hf             | PAW_PBE Hf 20Jan2003       |
| Hg             | PAW_PBE Hg_sv_GW 16Apr2014 |

|    |                         |
|----|-------------------------|
| Ho | PAW_PBE Ho 23Dec2003    |
| I  | PAW_PBE I_GW 12Mar2012  |
| In | PAW_PBE In 08Apr2002    |
| Ir | PAW_PBE Ir 06Sep2000    |
| K  | PAW K_sv_GW 31Mar2010   |
| Kr | PAW Kr_GW 02Oct2006     |
| La | PAW_PBE La 06Sep2000    |
| Li | PAW Li_GW 11May2007     |
| Lu | PAW_PBE Lu 23Dec2003    |
| Mg | PAW Mg_GW 13Apr2007     |
| Mn | PAW Mn_GW 31Mar2010     |
| Mo | PAW_PBE Mo 08Apr2002    |
| N  | PAW N_GW_new 19Mar2012  |
| Na | PAW_PBE Na 08Apr2002    |
| Nb | PAW Nb_sv_GW 23Mar2010  |
| Nd | PAW_PBE Nd 23Dec2003    |
| Ne | PAW Ne_GW 02Oct2006     |
| Ni | PAW Ni_GW 31Mar2010     |
| Np | PAW_PBE Np 06Sep2000    |
| O  | PAW O_GW 19Mar2012      |
| Os | PAW_PBE Os 17Jan2003    |
| P  | PAW P_GW 19Mar2012      |
| Pa | PAW_PBE Pa 07Sep2000    |
| Pb | PAW_PBE Pb 08Apr2002    |
| Pd | PAW Pd_GW 06Mar2008     |
| Pm | PAW_PBE Pm 23Dec2003    |
| Po | PAW_PBE Po 10Feb2004    |
| Pr | PAW_PBE Pr 23Dec2003    |
| Pt | PAW Pt_GW 10Mar2009     |
| Pu | PAW_PBE Pu 06Sep2000    |
| Ra | PAW_PBE Ra_sv 29May2007 |
| Rb | PAW Rb_sv_GW 23Mar2010  |
| Re | PAW_PBE Re 17Jan2003    |
| Rh | PAW Rh_GW 06Mar2008     |
| Rn | PAW_PBE Rn 28Aug2006    |
| Ru | PAW_PBE Ru 04Feb2005    |
| S  | PAW S_GW 19Mar2012      |
| Sb | PAW Sb_GW 21Mar2012     |
| Sc | PAW_PBE Sc 04Feb2005    |
| Se | PAW Se_GW 20Mar2012     |
| Si | PAW Si_GW 19Mar2012     |
| Sm | PAW_PBE Sm 23Dec2003    |
| Sn | PAW_PBE Sn 08Apr2002    |



|    |                        |
|----|------------------------|
| Sr | PAW Sr_sv_GW 23Mar2010 |
| Ta | PAW_PBE Ta 17Jan2003   |
| Tb | PAW_PBE Tb 23Dec2003   |
| Tc | PAW_PBE Tc 04Feb2005   |
| Te | PAW Te_GW 22Mar2012    |
| Th | PAW_PBE Th 07Sep2000   |
| Ti | PAW_PBE Ti 08Apr2002   |
| Tl | PAW_PBE Tl 08Apr2002   |
| Tm | PAW_PBE Tm 23Dec2003   |
| U  | PAW_PBE U 06Sep2000    |
| V  | PAW_PBE V 08Apr2002    |
| W  | PAW_PBE W 08Apr2002    |
| Xe | PAW Xe_GW 08Jan2009    |
| Y  | PAW Y_sv_GW 23Mar2010  |
| Yb | PAW_PBE Yb 23Dec2003   |
| Zn | PAW Zn_GW 09Oct2010    |
| Zr | PAW Zr_sv_GW 07Apr2010 |

## 6. References

1. Butterworth-Heinemann, Oxford, 1997.
2. C. Colinet, K. Inden and R. Kikuchi, *Acta metall. mater.*, 1993, **41**, 1109-1118.
3. M. O'Keefe and N. E. Brese, *Journal of the American Chemical Society*, 1991, **113**, 3226-3229.
4. L. Wang, T. Maxisch and G. Ceder, *Physical Review B*, 2006, **73**, 195107.
